# Supplementary material for: Stroke and Athletes: A Scoping Review
Source: MDPI journal article supplement (doi:10.3390/ijerph181910047), 2021-09-24
Supplement: s1 [file s1]

Table S1:  
Stroke and Athletes  
Final Search Strategies

**Ovid MEDLINE(R) and Epub Ahead of Print, In-Process & Other Non-Indexed Citations and Daily**

| #  | Searches                                                                                                                                                                                                                                                                                                                                                                                                                                                                                                                                                                                            | Results |
|----|-----------------------------------------------------------------------------------------------------------------------------------------------------------------------------------------------------------------------------------------------------------------------------------------------------------------------------------------------------------------------------------------------------------------------------------------------------------------------------------------------------------------------------------------------------------------------------------------------------|---------|
| 1  | stroke/ or stroke, lacunar/                                                                                                                                                                                                                                                                                                                                                                                                                                                                                                                                                                         | 100500  |
| 2  | *brain ischemia/ or *brain infarction/ or *ischemic attack, transient/ or *vertebrobasilar insufficiency/                                                                                                                                                                                                                                                                                                                                                                                                                                                                                           | 58434   |
| 3  | *Cerebrovascular Disorders/ or *Cerebral Infarction/                                                                                                                                                                                                                                                                                                                                                                                                                                                                                                                                                | 45929   |
| 4  | *intracranial hemorrhages/ or *cerebral hemorrhage/ or *subarachnoid hemorrhage/                                                                                                                                                                                                                                                                                                                                                                                                                                                                                                                    | 40714   |
| 5  | *Vertebral Artery Dissection/ or *Carotid Artery, Internal, Dissection/                                                                                                                                                                                                                                                                                                                                                                                                                                                                                                                             | 2115    |
| 6  | *Intracranial Embolism/ or *Intracranial Aneurysm/                                                                                                                                                                                                                                                                                                                                                                                                                                                                                                                                                  | 28293   |
| 7  | *hemiplegia/ or exp *paresis/                                                                                                                                                                                                                                                                                                                                                                                                                                                                                                                                                                       | 11760   |
| 8  | (stroke or strokes).ti,kf.                                                                                                                                                                                                                                                                                                                                                                                                                                                                                                                                                                          | 115630  |
| 9  | ((ischemic or ischaemic or lacunar or acute) adj2 stroke*).tw,kf.                                                                                                                                                                                                                                                                                                                                                                                                                                                                                                                                   | 66188   |
| 10 | ((cerebrovasc* or cerebral vasc*) adj2 (injur* or disease* or incident* or accident*)).tw,kf.                                                                                                                                                                                                                                                                                                                                                                                                                                                                                                       | 31129   |
| 11 | ((brain* or cerebr* or cerebell* or intracerebral or intracranial or subarachnoid) adj2 (haemorrhage* or hemorrhage* or haematoma* or hematoma* or bleed*)).tw,kf.                                                                                                                                                                                                                                                                                                                                                                                                                                  | 64550   |
| 12 | ((artery or arterial) adj2 dissection).tw,kf.                                                                                                                                                                                                                                                                                                                                                                                                                                                                                                                                                       | 6338    |
| 13 | (transient adj2 attack*).tw,kf.                                                                                                                                                                                                                                                                                                                                                                                                                                                                                                                                                                     | 14378   |
| 14 | (hemipleg* or hemipar* or paresis or paretic or hemineglect or hemi-neglect or ((unilateral or spatial or hemi?spatial or visual) adj2 neglect)).tw,kf.                                                                                                                                                                                                                                                                                                                                                                                                                                             | 38880   |
| 15 | or/1-13                                                                                                                                                                                                                                                                                                                                                                                                                                                                                                                                                                                             | 332757  |
| 16 | exp Athletic Injuries/ or exp Athletes/ or exp Para-Athletes/                                                                                                                                                                                                                                                                                                                                                                                                                                                                                                                                       | 38180   |
| 17 | Sports/ or Sports medicine/                                                                                                                                                                                                                                                                                                                                                                                                                                                                                                                                                                         | 39179   |
| 18 | exp baseball/ or exp basketball/ or exp Bicycling/ or exp boxing/ or exp football/ or exp gymnastics/ or exp hockey/ or exp martial arts/ or exp racquet sports/ or exp skating/ or exp Skiing/ or exp snow sports/ or exp soccer/ or exp Swimming/ or exp Tennis/ or exp "track and field"/ or exp volleyball/ or exp water sports/ or exp wrestling/ or exp youth sports/                                                                                                                                                                                                                         | 66841   |
| 19 | (athlete* or athletic* or para-athlete* or parathlet* or Paralympic* or para-olympic* or olympic*).tw,kf.                                                                                                                                                                                                                                                                                                                                                                                                                                                                                           | 61654   |
| 20 | sport*.tw,kf.                                                                                                                                                                                                                                                                                                                                                                                                                                                                                                                                                                                       | 77372   |
| 21 | (baseball or basketball or biking or bicycling* or bmx or boxing or "bull rid*" or bullrid* or cheerleading or "cheer leading" or climbing or cricket or diving or equestrian or football or golf or gymnastics or handball or "horse* riding" or hockey or lacrosse or mountaineering or netball or "net ball" or "racquet sport*" or racquetball or ringette or "roller derb*" or rollerskat* or rodeo* or rugby or skateboard* or skating or skiing or snowboard* or "snow sport*" or soccer or softball or squash or swimming or tennis or "track and field" or wrestling or volleyball).tw,kf. | 92372   |
| 22 | (archery or badminton or bobsled* or bobsleigh* or canoe* or "cross country" or fencing or kayak* or luge or rifle or rowing or sailing or skeleton or "ski jump*" or                                                                                                                                                                                                                                                                                                                                                                                                                               | 49236   |

|    |                                                                                                                                                                                                                                                                                                                                                                                                                                                   |         |
|----|---------------------------------------------------------------------------------------------------------------------------------------------------------------------------------------------------------------------------------------------------------------------------------------------------------------------------------------------------------------------------------------------------------------------------------------------------|---------|
|    | sledding or surfing or trampoline* or "water polo" or "weight lifting" or windsurfing or yachting).tw,kf.                                                                                                                                                                                                                                                                                                                                         |         |
| 23 | (biker* or boxer* or "cheer leader*" or cheerleader* or climber* or cyclist* or diver or divers or fencer* or fighter* or footballer* or goalie* or golfer* or gymnast or gymnasts or "horse* rider*" or jockey* or judoka* or mountaineer* or rower* or sailor* or skater* or skier* or sledder* or snowboarder* or surfer* or swimmer* or "weight lifter*" or wrestler*).tw,kf.                                                                 | 29223   |
| 24 | or/16-23                                                                                                                                                                                                                                                                                                                                                                                                                                          | 276295  |
| 25 | 15 and 24                                                                                                                                                                                                                                                                                                                                                                                                                                         | 2118    |
| 26 | (stroke* adj2 (volume or heat or length or repetition* or quality or cycle* or asymmetrical or symmetrical or power or distance or index or gearing or kinematic* or velocity or biomechanics or mechanics or technique* or amplitude*)).tw,kf.                                                                                                                                                                                                   | 24240   |
| 27 | (Stroke* adj3 (volley or overhand or underhand or overhead or crawl or rally or rallies or forehand or backhand or putting or smash* or backward or forward or special)).tw,kf.                                                                                                                                                                                                                                                                   | 616     |
| 28 | (Stroke* adj1 (swimming or swim or kayak* or rowing or badminton or volleyball or tennis or golf* or paddl* or racket or racquet or practice or ball or balls or oar* or canoe*)).tw,kf.                                                                                                                                                                                                                                                          | 309     |
| 29 | or/26-28                                                                                                                                                                                                                                                                                                                                                                                                                                          | 24895   |
| 30 | 25 not 29                                                                                                                                                                                                                                                                                                                                                                                                                                         | 1688    |
| 31 | limit 30 to "humans only (removes records about animals)"                                                                                                                                                                                                                                                                                                                                                                                         | 1511    |
| 32 | (Rat or rats or fish* or duck* or worm* or zebrafish* or mice or mouse or fin or fins or rabbit* or dog or dogs or animal-model* or bovine or rodent* or whale* or lion*).ti.                                                                                                                                                                                                                                                                     | 1775113 |
| 33 | 31 not 32                                                                                                                                                                                                                                                                                                                                                                                                                                         | 1487    |
| 34 | limit 33 to (address or autobiography or bibliography or biography or clinical trial, veterinary or clinical trials, veterinary as topic or dataset or dictionary or directory or interactive tutorial or legal case or legislation or observational study, veterinary or patient education handout or portrait or randomized controlled trial, veterinary or "systematic review" or systematic reviews as topic or video-audio media or webcast) | 64      |
| 35 | 33 not 34                                                                                                                                                                                                                                                                                                                                                                                                                                         | 1423    |
| 36 | limit 35 to english language                                                                                                                                                                                                                                                                                                                                                                                                                      | 1253    |

## Embase

| # | Searches                                                                   | Results |
|---|----------------------------------------------------------------------------|---------|
| 1 | cerebrovascular accident/ or lacunar stroke/                               | 205337  |
| 2 | *brain ischemia/ or *transient ischemic attack/                            | 84968   |
| 3 | *brain infarction/ or *cerebrovascular disease/ or *cerebellum infarction/ | 41991   |
| 4 | *brain hemorrhage/ or *cerebellum hemorrhage/ or *subarachnoid hemorrhage/ | 52440   |
| 5 | *artery dissection/ or *carotid artery injury/                             | 6682    |
| 6 | *brain embolism/ or *intracranial aneurysm/                                | 13920   |
| 7 | *hemiplegia/ or *paresis/                                                  | 7892    |
| 8 | (stroke or strokes).ti,kw.                                                 | 191141  |
| 9 | ((ischemic or ischaemic or lacunar or acute) adj2 stroke*).tw,kw.          | 115804  |

|    |                                                                                                                                                                                                                                                                                                                                                                                                                                                                                                                                                                                                                  |        |
|----|------------------------------------------------------------------------------------------------------------------------------------------------------------------------------------------------------------------------------------------------------------------------------------------------------------------------------------------------------------------------------------------------------------------------------------------------------------------------------------------------------------------------------------------------------------------------------------------------------------------|--------|
| 10 | ((cerebrovasc* or cerebral vasc*) adj2 (injur* or disease* or incident* or accident*)).tw,kw.                                                                                                                                                                                                                                                                                                                                                                                                                                                                                                                    | 47662  |
| 11 | ((brain* or cerebr* or cerebell* or intracerebral or intracranial or subarachnoid) adj2 (haemorrhage* or hemorrhage* or haematoma* or hematoma* or bleed*)).tw,kw.                                                                                                                                                                                                                                                                                                                                                                                                                                               | 91098  |
| 12 | ((artery or arterial) adj2 dissection).tw,kw.                                                                                                                                                                                                                                                                                                                                                                                                                                                                                                                                                                    | 9339   |
| 13 | (transient adj2 attack*).tw,kw.                                                                                                                                                                                                                                                                                                                                                                                                                                                                                                                                                                                  | 22225  |
| 14 | (hemipleg* or hemipar* or paresis or paretic or hemineglect or hemi-neglect or ((unilateral or spatial or hemi?spatial or visual) adj2 neglect)).tw,kw.                                                                                                                                                                                                                                                                                                                                                                                                                                                          | 52728  |
| 15 | or/1-14                                                                                                                                                                                                                                                                                                                                                                                                                                                                                                                                                                                                          | 553811 |
| 16 | athlete/ or basketball player/ or body builder/ or boxer/ or cyclist/ or football player/ or hockey player/ or judoka/ or skier/ or soccer player/ or triathlete/ or wrestler/ or disabled athlete/                                                                                                                                                                                                                                                                                                                                                                                                              | 52574  |
| 17 | sport/ or aquatic sport/ or exp athletics/ or baseball/ or basketball/ or body building/ or boxing/ or exp combat sport/ or contact sport/ or "cricket (sport)"/ or cycling/ or diving/ or endurance sport/ or extreme sport/ or football/ or hockey/ or horseback riding/ or ice hockey/ or martial art/ or mountaineering/ or exp racquet sport/ or rock climbing/ or roller skating/ or rowing/ or rugby/ or skateboarding/ or skating/ or skiing/ or soccer/ or swimming/ or team sport/ or exp tennis/ or "track and field"/ or volleyball/ or water skiing/ or winter sport/ or wrestling/ or youth sport/ | 128220 |
| 18 | sport injury/                                                                                                                                                                                                                                                                                                                                                                                                                                                                                                                                                                                                    | 29468  |
| 19 | sports medicine/                                                                                                                                                                                                                                                                                                                                                                                                                                                                                                                                                                                                 | 16838  |
| 20 | (athlete* or athletic* or para-athlete* or parathlet* or Paralympic* or para-olympic* or olympic*).tw,kw.                                                                                                                                                                                                                                                                                                                                                                                                                                                                                                        | 72995  |
| 21 | sport*.tw,kw.                                                                                                                                                                                                                                                                                                                                                                                                                                                                                                                                                                                                    | 102114 |
| 22 | (baseball or basketball or biking or bicycling* or bmx or boxing or "bull rid*" or bullrid* or cheerleading or "cheer leading" or climbing or cricket or diving or equestrian or football or golf or gymnastics or handball or "horse* riding" or hockey or lacrosse or mountaineering or netball or "net ball" or "racquet sport*" or racquetball or ringette or "roller derb*" or rollerskat* or rodeo* or rugby or skateboard* or skating or skiing or snowboard* or "snow sport*" or soccer or softball or squash or swimming or tennis or "track and field" or wrestling or volleyball).tw,kw.              | 107745 |
| 23 | (archery or badminton or bobsled* or bobsleigh* or canoe* or "cross country" or fencing or kayak* or luge or rifle or rowing or sailing or skeleton or "ski jump*" or sledding or surfing or trampolin* or "water polo" or "weight lifting" or windsurfing or yachting).tw,kw.                                                                                                                                                                                                                                                                                                                                   | 63011  |
| 24 | (biker* or boxer* or "cheer leader*" or cheerleader* or climber* or cyclist* or diver or divers or fencer* or fighter* or footballer* or goalie* or golfer* or gymnast or gymnasts or "horse* rider*" or jockey* or judoka* or mountaineer* or rower* or sailor* or skater* or skier* or sledder* or snowboarder* or surfer* or swimmer* or "weight lifter*" or wrestler*).tw,kw.                                                                                                                                                                                                                                | 33025  |
| 25 | or/16-24                                                                                                                                                                                                                                                                                                                                                                                                                                                                                                                                                                                                         | 339576 |
| 26 | 15 and 25                                                                                                                                                                                                                                                                                                                                                                                                                                                                                                                                                                                                        | 4078   |
| 27 | (stroke* adj2 (volume or heat or length or repetition* or quality or cycle* or asymmetrical or symmetrical or power or distance or index or gearing or kinematic* or velocity or biomechanics or mechanics or technique* or amplitude*)).tw,kw.                                                                                                                                                                                                                                                                                                                                                                  | 35163  |

|    |                                                                                                                                                                                          |         |
|----|------------------------------------------------------------------------------------------------------------------------------------------------------------------------------------------|---------|
| 28 | (Stroke* adj3 (volley or overhand or underhand or overhead or crawl or rally or rallies or forehand or backhand or putting or smash* or backward or forward or special)).tw,kw.          | 850     |
| 29 | (Stroke* adj1 (swimming or swim or kayak* or rowing or badminton or volleyball or tennis or golf* or paddl* or racket or racquet or practice or ball or balls or oar* or canoe*)).tw,kw. | 408     |
| 30 | or/27-29                                                                                                                                                                                 | 36019   |
| 31 | 26 not 30                                                                                                                                                                                | 3364    |
| 32 | limit 31 to "humans only (removes records about animals)"                                                                                                                                | 3034    |
| 33 | (Rat or rats or fish* or duck* or worm* or zebrafish* or mice or mouse or fin or fins or rabbit* or dog or dogs or animal-model* or bovine or rodent* or whale* or lion*).ti.            | 1894195 |
| 34 | 32 not 33                                                                                                                                                                                | 3010    |
| 35 | limit 34 to conference abstracts                                                                                                                                                         | 814     |
| 36 | 34 not 35                                                                                                                                                                                | 2196    |
| 37 | limit 36 to (book or book series or conference proceeding or major reference work or trade journal)                                                                                      | 6       |
| 38 | 36 not 37                                                                                                                                                                                | 2190    |
| 39 | limit 38 to english language                                                                                                                                                             | 1883    |

#### CINAHL Plus with Full Text

| #  | Query                                                                                                                                                                                           | Results |
|----|-------------------------------------------------------------------------------------------------------------------------------------------------------------------------------------------------|---------|
| S1 | (MH "Stroke") OR (MH "Stroke, Lacunar")                                                                                                                                                         | 72,632  |
| S2 | (MM "Cerebrovascular Disorders") OR (MM "Cerebral Ischemia") OR (MM "Cerebral Ischemia, Transient")                                                                                             | 18,023  |
| S3 | (MM "Intracranial Hemorrhage") OR (MM "Cerebral Hemorrhage") OR (MM "Hematoma, Subdural") OR (MM "Subarachnoid Hemorrhage")                                                                     | 10,829  |
| S4 | (MM "Vertebral Artery Dissections") OR (MM "Carotid Artery Dissections") OR (MM "Arterial Dissections") OR (MM "Intracranial Arterial Diseases") OR (MM "Intracranial Embolism and Thrombosis") | 2,228   |
| S5 | (MM "Hemiplegia")                                                                                                                                                                               | 4,540   |
| S6 | TI (stroke or strokes)                                                                                                                                                                          | 56,848  |
| S7 | TI ( ((ischemic or ischaemic or lacunar or acute) N2 stroke*) ) OR AB ( ((ischemic or ischaemic or lacunar or acute) N2 stroke*) )                                                              | 27,080  |
| S8 | TI ( ((cerebrovasc* or cerebral vasc*) N2 (injur* or disease* or incident* or accident*)) ) OR AB ( ((cerebrovasc* or cerebral vasc*) N2 (injur* or disease* or incident* or accident*)) )      | 8,277   |
| S9 | TI ( ((brain* or cerebr* or cerebell* or intracerebral or intracranial or subarachnoid) N2 (haemorrhage* or hemorrhage* or haematoma* or hematoma* or bleed*)) ) OR AB (                        | 15,112  |

|     |                                                                                                                                                                                                                                                                                                                                                                                                                                                                                                                                                                                                                                                                                                                                                                                                                                                                                                                                                                                                                                                                                                                                                                                                                                                                                                    |         |
|-----|----------------------------------------------------------------------------------------------------------------------------------------------------------------------------------------------------------------------------------------------------------------------------------------------------------------------------------------------------------------------------------------------------------------------------------------------------------------------------------------------------------------------------------------------------------------------------------------------------------------------------------------------------------------------------------------------------------------------------------------------------------------------------------------------------------------------------------------------------------------------------------------------------------------------------------------------------------------------------------------------------------------------------------------------------------------------------------------------------------------------------------------------------------------------------------------------------------------------------------------------------------------------------------------------------|---------|
|     | ((brain* or cerebr* or cerebell* or intracerebral or intracranial or subarachnoid) N2 (haemorrhage* or hemorrhage* or haematoma* or hematoma* or bleed*)) )                                                                                                                                                                                                                                                                                                                                                                                                                                                                                                                                                                                                                                                                                                                                                                                                                                                                                                                                                                                                                                                                                                                                        |         |
| S10 | TI ( ((artery or arterial) N2 dissection) ) OR AB ( ((artery or arterial) N2 dissection) )                                                                                                                                                                                                                                                                                                                                                                                                                                                                                                                                                                                                                                                                                                                                                                                                                                                                                                                                                                                                                                                                                                                                                                                                         | 2,177   |
| S11 | TI (transient N2 attack*) OR AB (transient N2 attack*)                                                                                                                                                                                                                                                                                                                                                                                                                                                                                                                                                                                                                                                                                                                                                                                                                                                                                                                                                                                                                                                                                                                                                                                                                                             | 4,950   |
| S12 | TI ( (hemipleg* or hemipar* or paresis or paretic or hemineglect or hemi-neglect or ((unilateral or spatial or hemi?spatial or visual) N2 neglect)) ) OR AB ( (hemipleg* or hemipar* or paresis or paretic or hemineglect or hemi-neglect or ((unilateral or spatial or hemi?spatial or visual) N2 neglect))(transient N2 attack*) )                                                                                                                                                                                                                                                                                                                                                                                                                                                                                                                                                                                                                                                                                                                                                                                                                                                                                                                                                               | 4,492   |
| S13 | S1 OR S2 OR S3 OR S4 OR S5 OR S6 OR S7 OR S8 OR S9 OR S10 OR S11 OR S12                                                                                                                                                                                                                                                                                                                                                                                                                                                                                                                                                                                                                                                                                                                                                                                                                                                                                                                                                                                                                                                                                                                                                                                                                            | 120,484 |
| S14 | MH "Sports") OR (MH "Horseback Riding") OR (MH "Animal Sports") OR (MH "Amateur Sports") OR (MH "Aquatic Sports") OR (MH "Diving") OR (MH "Rowing") OR (MH "Swimming") OR (MH "Athletic Performance") OR (MH "Athletic Training") OR (MH "Athletic Training Programs") OR (MH "Sport Specific Training") OR (MH "Body Building") OR (MH "College Sports") OR (MH "Contact Sports") OR (MH "Boxing") OR (MH "Football") OR (MH "Martial Arts") OR (MH "Rugby") OR (MH "Wrestling") OR (MH "Cycling") OR (MH "Endurance Sports") OR (MH "Extreme Sports") OR (MH "Fencing") OR (MH "Golf") OR (MH "Gymnastics") OR (MH "Handball") OR (MH "Mountaineering") OR (MH "Professional Sports") OR (MH "Racquet Sports") OR (MH "Tennis") OR (MH "Rock Climbing") OR (MH "Skating") OR (MH "Ice Skating") OR (MH "Skateboarding") OR (MH "Skiing") OR (MH "Snow Skiing") OR (MH "Sporting Events") OR (MH "Sports, Disabled") OR (MH "Sports Participation") OR (MH "Target Sports") OR (MH "Archery") OR (MH "Baseball") OR (MH "Team Sports") OR (MH "Basketball") OR (MH "Cricket (Sports)") OR (MH "Hockey") OR (MH "Soccer") OR (MH "Softball") OR (MH "Volleyball") OR (MH "Track and Field") OR (MH "Weight Lifting") OR (MH "Winter Sports") OR (MH "Snowboarding") OR (MH "Cross Country Skiing") | 74,359  |
| S15 | (MH "Athletic Injuries") OR (MH "Aquatic Sports Injuries") OR (MH "Skiing Injuries") OR (MH "Swimming Injuries") OR (MH "Baseball Injuries") OR (MH "Basketball Injuries") OR (MH "Boxing Injuries") OR (MH "Cricket Injuries") OR (MH "Cycling Injuries") OR (MH "Fencing Injuries") OR (MH "Football Injuries") OR (MH "Golf Injuries") OR (MH "Gymnastics Injuries") OR (MH "Hockey Injuries") OR (MH "Martial Arts Injuries") OR (MH "Mountaineering Injuries") OR (MH "Racquet Sports Injuries") OR (MH "Tennis Injuries") OR (MH "Rock Climbing Injuries") OR (MH "Rugby Injuries") OR (MH "Skateboarding Injuries") OR (MH "Soccer Injuries") OR (MH "Volleyball Injuries") OR (MH "Winter Sports Injuries") OR (MH "Snowboarding Injuries")                                                                                                                                                                                                                                                                                                                                                                                                                                                                                                                                                | 22,688  |
| S16 | (MH "Sports Medicine") or (MH "Athletes+")                                                                                                                                                                                                                                                                                                                                                                                                                                                                                                                                                                                                                                                                                                                                                                                                                                                                                                                                                                                                                                                                                                                                                                                                                                                         | 35,731  |
| S17 | TI sport* OR AB sport*                                                                                                                                                                                                                                                                                                                                                                                                                                                                                                                                                                                                                                                                                                                                                                                                                                                                                                                                                                                                                                                                                                                                                                                                                                                                             | 49,742  |
| S18 | TI ( (baseball or basketball or biking or bicycling* or bmx or boxing or bullrid* or "bull rid*" or cheerleading or "cheer leading" or climbing or cricket or diving or equestrian or football or golf or gymnastics or handball or "horse* riding" or hockey or lacrosse or mountaineering or netball or "net ball" or "racquet sport*" or racquetball or ringette or rodeo* or "roller derb*" or rollerskat* or rugby or skateboard* or skating or skiing or snowboard* or "snow sport*" or soccer or softball or squash or swimming or tennis or                                                                                                                                                                                                                                                                                                                                                                                                                                                                                                                                                                                                                                                                                                                                                | 38,144  |

|     |                                                                                                                                                                                                                                                                                                                                                                                                                                                                                                                                                                                                                                                                                                                                                                                |         |
|-----|--------------------------------------------------------------------------------------------------------------------------------------------------------------------------------------------------------------------------------------------------------------------------------------------------------------------------------------------------------------------------------------------------------------------------------------------------------------------------------------------------------------------------------------------------------------------------------------------------------------------------------------------------------------------------------------------------------------------------------------------------------------------------------|---------|
|     | "track and field" or wrestling or volleyball) ) OR AB ( (baseball or basketball or biking or bicycling* or bmx or boxing or bullrid* or "bull rid*" or cheerleading or "cheer leading" or climbing or cricket or diving or equestrian or football or golf or gymnastics or handball or "horse* riding" or hockey or lacrosse or mountaineering or netball or "net ball" or "racquet sport*" or racquetball or ringette or rodeo* or "roller derb*" or rollerskat* or rugby or skateboard* or skating or skiing or snowboard* or "snow sport*" or soccer or softball or squash or swimming or tennis or "track and field" or wrestling or volleyball) )                                                                                                                         |         |
| S19 | TI ( (archery or badminton or bobsled* or bobsleigh* or canoe* or "cross country" or fencing or kayak* or luge or rifle or rowing or sailing or skeleton or "ski jump*" or sledding or surfing or trampolin* or "water polo" or "weight lifting" or windsurfing or yachting) ) OR AB ( (archery or badminton or bobsled* or bobsleigh* or canoe* or "cross country" or fencing or kayak* or luge or rifle or rowing or sailing or skeleton or "ski jump*" or sledding or surfing or trampolin* or "water polo" or "weight lifting" or windsurfing or yachting) )                                                                                                                                                                                                               | 8,804   |
| S20 | TI ( (aikido or judo or jiu-jitsu or "jiu-jitsu" or jujitsu or "ju jitsu" or karate or kickbox* or "Martial art*" or taekwondo or "tae kwon do" or "tai ji") ) OR AB ( (aikido or judo or jiu-jitsu or "jiu-jitsu" or jujitsu or "ju jitsu" or karate or kickbox* or "Martial art*" or taekwondo or "tae kwon do" or "tai ji") )                                                                                                                                                                                                                                                                                                                                                                                                                                               | 1,546   |
| S21 | TI ( (athlete* or athletic* or para-athlete* or parathlet* or Paralympic* or para-olympic* or olympic*) ) OR AB ( (athlete* or athletic* or para-athlete* or parathlet* or Paralympic* or para-olympic* or olympic*) )                                                                                                                                                                                                                                                                                                                                                                                                                                                                                                                                                         | 39,896  |
| S22 | TI ( ( (biker* or boxer* or "cheer leader*" or cheerleader* or climber* or cyclist* or diver or divers or fencer* or fighter* or footballer* or goalie* or golfer* or gymnast or gymnasts or "horse* rider*" or jockey* or judoka* or mountaineer* or rower* or sailor* or skater* or skier* or sledder* or snowboarder* or surfer* or swimmer* or "weight lifter*" or wrestler*) ) ) OR AB ( ( (biker* or boxer* or "cheer leader*" or cheerleader* or climber* or cyclist* or diver or divers or fencer* or fighter* or footballer* or goalie* or golfer* or gymnast or gymnasts or "horse* rider*" or jockey* or judoka* or mountaineer* or rower* or sailor* or skater* or skier* or sledder* or snowboarder* or surfer* or swimmer* or "weight lifter*" or wrestler*) ) ) | 13,041  |
| S23 | S14 OR S15 OR S16 OR S17 OR S18 OR S19 OR S20 OR S21 OR S22                                                                                                                                                                                                                                                                                                                                                                                                                                                                                                                                                                                                                                                                                                                    | 145,804 |
| S24 | S13 AND S23                                                                                                                                                                                                                                                                                                                                                                                                                                                                                                                                                                                                                                                                                                                                                                    | 1,166   |
| S25 | TI ( (stroke* N2 (volume or heat or length or repetition* or quality or cycle* or asymmetrical or symmetrical or power or distance or index or gearing or kinematic* or velocity or biomechanics or mechanics or technique* or amplitude*)) ) OR AB ( (stroke* N2 (volume or heat or length or repetition* or quality or cycle* or asymmetrical or symmetrical or power or distance or index or gearing or kinematic* or velocity or biomechanics or mechanics or technique* or amplitude*)) )                                                                                                                                                                                                                                                                                 | 6,297   |
| S26 | TI ( (Stroke* N3 (volley or overhand or underhand or overhead or crawl or rally or rallies or forehand or backhand or putting or smash* or backward or forward or special)) ) OR AB ( (Stroke* N3 (volley or overhand or underhand or overhead or crawl                                                                                                                                                                                                                                                                                                                                                                                                                                                                                                                        | 302     |

|     |                                                                                                                                                                                                                                                                                                                                                                                  |        |
|-----|----------------------------------------------------------------------------------------------------------------------------------------------------------------------------------------------------------------------------------------------------------------------------------------------------------------------------------------------------------------------------------|--------|
|     | or rally or rallies or forehand or backhand or putting or smash* or backward or forward or special)) )                                                                                                                                                                                                                                                                           |        |
| S27 | TI ( (Stroke* N1 (swimming or swim or kayak* or rowing or badminton or volleyball or tennis or golf* or paddl* or racket or racquet or practice or ball or balls or oar* or canoe*)) ) OR AB ( (Stroke* N1 (swimming or swim or kayak* or rowing or badminton or volleyball or tennis or golf* or paddl* or racket or racquet or practice or ball or balls or oar* or canoe*)) ) | 514    |
| S28 | S25 OR S26 OR S27                                                                                                                                                                                                                                                                                                                                                                | 6,924  |
| S29 | S24 NOT S28                                                                                                                                                                                                                                                                                                                                                                      | 922    |
| S30 | TI (Rat or rats or fish* or duck* or worm* or zebrafish* or mice or mouse or fin or fins or rabbit* or dog or dogs or animal-model* or bovine or rodent* or whale* or lion*)                                                                                                                                                                                                     | 93,283 |
| S31 | S29 NOT S30                                                                                                                                                                                                                                                                                                                                                                      | 903    |
| S32 | S29 NOT S30<br>Narrow by Language; English                                                                                                                                                                                                                                                                                                                                       | 886    |

#### SportDiscus with Full Text

| #  | Query                                                                                                                                                                                                                                                                                                                                                                                                                       | Results |
|----|-----------------------------------------------------------------------------------------------------------------------------------------------------------------------------------------------------------------------------------------------------------------------------------------------------------------------------------------------------------------------------------------------------------------------------|---------|
| S1 | DE "STROKE"                                                                                                                                                                                                                                                                                                                                                                                                                 | 1,802   |
| S2 | DE "CEREBROVASCULAR disease" OR DE "CEREBRAL embolism & thrombosis" OR DE "CEREBRAL hemorrhage"                                                                                                                                                                                                                                                                                                                             | 2,838   |
| S3 | DE "CEREBRAL hemorrhage"                                                                                                                                                                                                                                                                                                                                                                                                    | 134     |
| S4 | DE "CEREBRAL embolism & thrombosis"                                                                                                                                                                                                                                                                                                                                                                                         | 45      |
| S5 | DE "HEMIPLEGIA" OR DE "PARALYSIS"                                                                                                                                                                                                                                                                                                                                                                                           | 1,673   |
| S6 | TI (stroke or strokes)                                                                                                                                                                                                                                                                                                                                                                                                      | 8,287   |
| S7 | TI ( ( ((ischemic or ischaemic or lacunar or acute) N2 stroke*) ) ) OR AB ( ( ((ischemic or ischaemic or lacunar or acute) N2 stroke*) ) ) OR KW ( ( ((ischemic or ischaemic or lacunar or acute) N2 stroke*) ) )                                                                                                                                                                                                           | 1,233   |
| S8 | TI ( ( ((cerebrovasc* or cerebral vasc*) N2 (injur* or disease* or incident* or accident*)) ) ) OR AB ( ( ((cerebrovasc* or cerebral vasc*) N2 (injur* or disease* or incident* or accident*)) ) ) OR KW ( ( ((cerebrovasc* or cerebral vasc*) N2 (injur* or disease* or incident* or accident*)) ) )                                                                                                                       | 772     |
| S9 | TI ( ( ((brain* or cerebr* or cerebell* or intracerebral or intracranial or subarachnoid) N2 (haemorrhage* or hemorrhage* or haematoma* or hematoma* or bleed*)) ) ) OR AB ( ( ((brain* or cerebr* or cerebell* or intracerebral or intracranial or subarachnoid) N2 (haemorrhage* or hemorrhage* or haematoma* or hematoma* or bleed*)) ) ) OR KW ( ( ((brain* or cerebr* or cerebell* or intracerebral or intracranial or | 513     |

|     |                                                                                                                                                                                                                                                                                                                                                                                                                                                                                                                                                                                                                                                                                                                                                                                                                                                                                                                                                                                                                                                                                                                                                                                                                                                                                                                                                                                                                                                                                                                                                                                                                                                                                                                                                                                                                                                                                                                                                             |         |
|-----|-------------------------------------------------------------------------------------------------------------------------------------------------------------------------------------------------------------------------------------------------------------------------------------------------------------------------------------------------------------------------------------------------------------------------------------------------------------------------------------------------------------------------------------------------------------------------------------------------------------------------------------------------------------------------------------------------------------------------------------------------------------------------------------------------------------------------------------------------------------------------------------------------------------------------------------------------------------------------------------------------------------------------------------------------------------------------------------------------------------------------------------------------------------------------------------------------------------------------------------------------------------------------------------------------------------------------------------------------------------------------------------------------------------------------------------------------------------------------------------------------------------------------------------------------------------------------------------------------------------------------------------------------------------------------------------------------------------------------------------------------------------------------------------------------------------------------------------------------------------------------------------------------------------------------------------------------------------|---------|
|     | subarachnoid) N2 (haemorrhage* or hemorrhage* or haematoma* or hematoma* or bleed*)) ) )                                                                                                                                                                                                                                                                                                                                                                                                                                                                                                                                                                                                                                                                                                                                                                                                                                                                                                                                                                                                                                                                                                                                                                                                                                                                                                                                                                                                                                                                                                                                                                                                                                                                                                                                                                                                                                                                    |         |
| S10 | TI ( ( ( (artery or arterial) N2 dissection) ) ) OR AB ( ( ( (artery or arterial) N2 dissection) ) ) OR KW ( ( ( (artery or arterial) N2 dissection) ) )                                                                                                                                                                                                                                                                                                                                                                                                                                                                                                                                                                                                                                                                                                                                                                                                                                                                                                                                                                                                                                                                                                                                                                                                                                                                                                                                                                                                                                                                                                                                                                                                                                                                                                                                                                                                    | 117     |
| S11 | TI (transient N2 attack*) OR AB (transient N2 attack*) OR KW (transient N2 attack*)                                                                                                                                                                                                                                                                                                                                                                                                                                                                                                                                                                                                                                                                                                                                                                                                                                                                                                                                                                                                                                                                                                                                                                                                                                                                                                                                                                                                                                                                                                                                                                                                                                                                                                                                                                                                                                                                         | 175     |
| S12 | TI ( ( (hemipleg* or hemipar* or paresis or paretic or hemineglect or hemi-neglect or ((unilateral or spatial or hemi?spatial or visual) N2 neglect)) ) ) OR AB ( ( (hemipleg* or hemipar* or paresis or paretic or hemineglect or hemi-neglect or ((unilateral or spatial or hemi?spatial or visual) N2 neglect)) ) ) OR KW ( ( (hemipleg* or hemipar* or paresis or paretic or hemineglect or hemi-neglect or ((unilateral or spatial or hemi?spatial or visual) N2 neglect)) ) )                                                                                                                                                                                                                                                                                                                                                                                                                                                                                                                                                                                                                                                                                                                                                                                                                                                                                                                                                                                                                                                                                                                                                                                                                                                                                                                                                                                                                                                                         | 2,796   |
| S13 | S1 OR S2 OR S3 OR S4 OR S5 OR S6 OR S7 OR S8 OR S9 OR S10 OR S11 OR S12                                                                                                                                                                                                                                                                                                                                                                                                                                                                                                                                                                                                                                                                                                                                                                                                                                                                                                                                                                                                                                                                                                                                                                                                                                                                                                                                                                                                                                                                                                                                                                                                                                                                                                                                                                                                                                                                                     | 13,474  |
| S14 | DE "SPORTS" OR DE "AMATEUR sports" OR DE "AQUATIC sports" OR DE "BALL games" OR DE "COLLEGE sports" OR DE "CONTACT sports" OR DE "ENDURANCE sports" OR DE "EXTREME sports" OR DE "INDIVIDUAL sports" OR DE "MILITARY sports" OR DE "OLYMPIC Games" OR DE "PROFESSIONAL sports" OR DE "RECREATIONAL sports" OR DE "SCHOOL sports" OR DE "SPORTS competitions" OR DE "TEAM sports" OR DE "VIOLENCE in sports" OR DE "WINTER sports" OR DE "SPORTS camps" OR DE "SPORTS events" OR DE "SPORTS medicine" OR DE "SPORTS participation"                                                                                                                                                                                                                                                                                                                                                                                                                                                                                                                                                                                                                                                                                                                                                                                                                                                                                                                                                                                                                                                                                                                                                                                                                                                                                                                                                                                                                           | 209,876 |
| S15 | DE "ATHLETICS" OR DE "BASEBALL" OR DE "BASKETBALL" OR DE "BICYCLE motocross" OR DE "BICYCLE racing" OR DE "BICYCLE racing training" OR DE "BOXING" OR DE "CYCLING" OR DE "CHEERLEADING" OR DE "ROCK climbing" OR DE "CRACK climbing" OR DE "FACE climbing" OR DE "FREE climbing" OR DE "INDOOR rock climbing" OR DE "CRICKET (Sport)" OR DE "CRICKET competitions" OR DE "INDOOR cricket" OR DE "TWENTY20 cricket" OR DE "ACROBATIC diving" OR DE "SPRINGBOARD diving" OR DE "HORSE sports" OR DE "EQUESTRIAN accidents" OR DE "DRESSAGE tests" OR DE "EVENTING (Horsemanship)" OR DE "GAMES on horseback" OR DE "HORSE racing" OR DE "SHOW jumping" OR DE "SHOW riding" OR DE "VAULTING (Horsemanship)" OR DE "FOOTBALL" OR DE "CANADIAN football" OR DE "COLLEGE football" OR DE "HIGH school football" OR DE "MINOR league football" OR DE "PROFESSIONAL football" OR DE "ARENA football" OR DE "RUGBY football" OR DE "COLLEGE rugby football" OR DE "FLORENTINE football" OR DE "PROFESSIONAL rugby football" OR DE "RUGBY League football" OR DE "RUGBY Union football" OR DE "RUGBY competitions" OR DE "SEVEN-a-side rugby football" OR DE "AUSTRALIAN football" OR DE "TACKLING (Rugby)" OR DE "GOLF" OR DE "COLLEGE golf" OR DE "PROFESSIONAL golf" OR DE "SNOW golf" OR DE "GYMNASTICS" OR DE "ARTISTIC gymnastics" OR DE "SWEDISH gymnastics" OR DE "TEAM aerobics" OR DE "TUMBLING" OR DE "HANDBALL" OR DE "TEAM handball" OR DE "HOCKEY" OR DE "COLLEGE hockey" OR DE "FIELD hockey" OR DE "INDOOR hockey" OR DE "LAWN hockey" OR DE "MINOR league hockey" OR DE "ROLLER hockey" OR DE "BALL hockey" OR DE "PROFESSIONAL hockey" OR DE "LACROSSE" OR DE "MOUNTAINEERING" OR DE "NETBALL" OR DE "RACKET games" OR DE "RACQUETBALL" OR DE "RINGETTE (Game)" OR DE "RODEOS" OR DE "BRONC riding" OR DE "BULL riding" OR DE "CALF roping" OR DE "CHUCKWAGON racing" OR DE "STEER roping" OR DE "STEER wrestling" OR DE "TEAM penning" OR DE "TEAM | 413,378 |



|     |                                                                                                                                                                                                                                                                                                                                                                                                                                                                                                                                                                                                                                                                                                                                                                                                                                                                                                                                                                                                                                                                                                                                                                                                                                                                                                                                                                                                                                                                                                                                                                   |         |
|-----|-------------------------------------------------------------------------------------------------------------------------------------------------------------------------------------------------------------------------------------------------------------------------------------------------------------------------------------------------------------------------------------------------------------------------------------------------------------------------------------------------------------------------------------------------------------------------------------------------------------------------------------------------------------------------------------------------------------------------------------------------------------------------------------------------------------------------------------------------------------------------------------------------------------------------------------------------------------------------------------------------------------------------------------------------------------------------------------------------------------------------------------------------------------------------------------------------------------------------------------------------------------------------------------------------------------------------------------------------------------------------------------------------------------------------------------------------------------------------------------------------------------------------------------------------------------------|---------|
|     | roping" OR DE "TRICK roping" OR DE "SKATEBOARDING" OR DE "SNOW skating" OR DE "SKATING" OR DE "FIGURE skating" OR DE "FREE skating" OR DE "ICE dancing" OR DE "PROFESSIONAL skating" OR DE "SPEED skating" OR DE "ROLLER skating" OR DE "SKI acrobatics" OR DE "SKI cross" OR DE "SKI mountaineering" OR DE "SKI racing" OR DE "SKIS & skiing" OR DE "SLALOM canoeing" OR DE "SLALOM racing" OR DE "SLALOM skiing" OR DE "SNOWBOARDING" OR DE "BACKCOUNTRY snowboarding" OR DE "SLOPESTYLE snowboarding" OR DE "SKIBOARDING" OR DE "SOCCER" OR DE "COLLEGE soccer" OR DE "HIGH school soccer" OR DE "INDOOR soccer" OR DE "PROFESSIONAL soccer" OR DE "SOFTBALL" OR DE "SLOW pitch softball" OR DE "YOUTH league softball" OR DE "SQUASH (Game)" OR DE "SWIMMING" OR DE "SWIMMING competitions" OR DE "SYNCHRONIZED swimming" OR DE "TENNIS" OR DE "COLLEGE tennis" OR DE "COURT tennis" OR DE "PROFESSIONAL tennis" OR DE "TABLE tennis" OR DE "TENNIS leagues" OR DE "TENNIS tournaments" OR DE "TENNIS training" OR DE "TRACK & field" OR DE "ALL-around (Track & field)" OR DE "COLLEGE track & field" OR DE "HURDLING (Track & field)" OR DE "INDOOR track & field" OR DE "JUMPING" OR DE "STEEPLECHASING (Track & field)" OR DE "VAULTING" OR DE "VOLLEYBALL" OR DE "BEACH volleyball" OR DE "COLLEGE volleyball" OR DE "PROFESSIONAL volleyball" OR DE "VOLLEYBALL competitions" OR DE "WRESTLING" OR DE "COLLEGE wrestling" OR DE "FREESTYLE wrestling" OR DE "HIGH school wrestling" OR DE "PROFESSIONAL wrestling" OR DE "SAMBO wrestling" OR DE "SUMO" |         |
| S16 | DE "AIKIDO" OR DE "JUDO" OR DE "SAN-jitsu" OR DE "JIU-jitsu" OR DE "KARATE" OR DE "TAE kwon do" OR DE "KICKBOXING" OR DE "MARTIAL arts" OR DE "CAPOEIRA (Dance)" OR DE "MIXED martial arts" OR DE "ARCHERY" OR DE "BADMINTON (Game)" OR DE "BADMINTON tournaments" OR DE "BADMINTON training" OR DE "CANOE racing" OR DE "CROSS-country ski racing" OR DE "NORDIC combined" OR DE "SPORT fencing" OR DE "FENCING" OR DE "KAYAKING" OR DE "KAYAKING training" OR DE "ICE luge racing" OR DE "SHOOTING contests" OR DE "ROWING" OR DE "SAILING" OR DE "SKELETON" OR DE "SKI jumping" OR DE "SLEDDING" OR DE "SURFING" OR DE "BODYBOARDING" OR DE "KITE surfing" OR DE "STAND-up paddle surfing" OR DE "WINDSURFING" OR DE "TRAMPOLINING" OR DE "WATER polo" OR DE "WEIGHT lifting" OR DE "YACHTING"                                                                                                                                                                                                                                                                                                                                                                                                                                                                                                                                                                                                                                                                                                                                                                 | 58,285  |
| S17 | DE "ATHLETES" OR DE "ATHLETES' health" OR DE "ARCHERS" OR DE "BADMINTON players" OR DE "BASEBALL players" OR DE "BASKETBALL players" OR DE "BOBSLEDDERS" OR DE "BODYBUILDERS" OR DE "BOXERS (Sports)" OR DE "BULLFIGHTERS" OR DE "CANOEISTS" OR DE "COLLEGE athletes" OR DE "CRICKET players" OR DE "CYCLISTS" OR DE "DIVERS" OR DE "ELITE athletes" OR DE "ENDURANCE athletes" OR DE "FENCERS" OR DE "FOOTBALL players" OR DE "GOLFERS" OR DE "GYMNASTS" OR DE "HANDBALL players" OR DE "HIGH school athletes" OR DE "HOCKEY players" OR DE "JUNIOR high school athletes" OR DE "LACROSSE players" OR DE "MALE athletes" OR DE "MARTIAL artists" OR DE "MIDDLE school athletes" OR DE "MOUNTAINEERS" OR DE "NETBALL players" OR DE "OFFENSIVE players" OR DE "OLDER athletes" OR DE "OLYMPIC athletes" OR DE "PROFESSIONAL athletes" OR DE "ROWERS" OR DE "RUGBY football players" OR DE "RUGBY football teams" OR DE "SKATEBOARDERS" OR DE "SKATERS" OR DE "SKIERS" OR DE "SNOWBOARDERS" OR DE "SOCCER players" OR DE "SOFTBALL players" OR DE                                                                                                                                                                                                                                                                                                                                                                                                                                                                                                                  | 283,712 |

|     |                                                                                                                                                                                                                                                                                                                                                                                                                                                                                                                                                                                                                                                                                                                                                                                                                                                                                                                                                                                                                                                                                                                                                                                                                                                                                                                                                                                                                                                                                                                                                                                                                                                                                                                                                                                                          |         |
|-----|----------------------------------------------------------------------------------------------------------------------------------------------------------------------------------------------------------------------------------------------------------------------------------------------------------------------------------------------------------------------------------------------------------------------------------------------------------------------------------------------------------------------------------------------------------------------------------------------------------------------------------------------------------------------------------------------------------------------------------------------------------------------------------------------------------------------------------------------------------------------------------------------------------------------------------------------------------------------------------------------------------------------------------------------------------------------------------------------------------------------------------------------------------------------------------------------------------------------------------------------------------------------------------------------------------------------------------------------------------------------------------------------------------------------------------------------------------------------------------------------------------------------------------------------------------------------------------------------------------------------------------------------------------------------------------------------------------------------------------------------------------------------------------------------------------|---------|
|     | "SQUASH players" OR DE "SURFERS" OR DE "SWIMMERS" OR DE "TABLE tennis players" OR DE "TEAM handball players" OR DE "TENNIS players" OR DE "TRACK & field athletes" OR DE "TRIATHLETES" OR DE "VOLLEYBALL players" OR DE "WATER polo players" OR DE "WEIGHT lifters" OR DE "WINDSURFERS (Persons)" OR DE "WOMEN athletes" OR DE "WRESTLERS"                                                                                                                                                                                                                                                                                                                                                                                                                                                                                                                                                                                                                                                                                                                                                                                                                                                                                                                                                                                                                                                                                                                                                                                                                                                                                                                                                                                                                                                               |         |
| S18 | DE "MARTIAL artists" OR DE "ARCHERS" OR DE "BADMINTON players" OR DE "CANOEISTS" OR DE "KAYAKERS" OR DE "SAILORS" OR DE "SURFERS" OR DE "TRAMPOLINISTS" OR DE "WATER polo players" OR DE "WEIGHT lifters"                                                                                                                                                                                                                                                                                                                                                                                                                                                                                                                                                                                                                                                                                                                                                                                                                                                                                                                                                                                                                                                                                                                                                                                                                                                                                                                                                                                                                                                                                                                                                                                                | 6,801   |
| S19 | DE "SPORTS medicine" OR DE "PEDIATRIC sports medicine" OR DE "SPORTS emergencies" OR DE "SPORTS nutrition" OR DE "SPORTS ophthalmology" OR DE "SPORTS physical therapy" OR DE "SPORTS injuries" OR DE "AQUATIC sports injuries" OR DE "BASEBALL injuries" OR DE "BASKETBALL injuries" OR DE "BOXING injuries" OR DE "CRICKET injuries" OR DE "DIVING injuries" OR DE "DIVING accidents" OR DE "EQUESTRIAN accidents" OR DE "FOOTBALL injuries" OR DE "GOLF injuries" OR DE "GYMNASTICS injuries" OR DE "HOCKEY injuries" OR DE "HORSE sports injuries" OR DE "IN-line skating injuries" OR DE "JUDO injuries" OR DE "KARATE injuries" OR DE "MARTIAL arts injuries" OR DE "MOTORSPORTS injuries" OR DE "NETBALL injuries" OR DE "RACKET game injuries" OR DE "RUGBY football injuries" OR DE "SKATEBOARDING injuries" OR DE "SKIING injuries" OR DE "SKIING accidents" OR DE "SOCCER injuries" OR DE "TENNIS injuries" OR DE "VAULTING injuries" OR DE "VOLLEYBALL injuries" OR DE "WINTER sports injuries" OR DE "JUDO injuries" OR DE "KARATE injuries" OR DE "MARTIAL arts injuries" OR DE "CANOEING accidents" OR DE "YACHTING accidents"                                                                                                                                                                                                                                                                                                                                                                                                                                                                                                                                                                                                                                                            | 32,442  |
| S20 | TI sport* OR AB sport* OR KW sport*                                                                                                                                                                                                                                                                                                                                                                                                                                                                                                                                                                                                                                                                                                                                                                                                                                                                                                                                                                                                                                                                                                                                                                                                                                                                                                                                                                                                                                                                                                                                                                                                                                                                                                                                                                      | 335,881 |
| S21 | TI ( (baseball or basketball or biking or bicycling* or bmx or boxing or "bull rid*" or bullrid* or cheerleading or "cheer leading" or climbing or cricket or diving or equestrian or football or golf or gymnastics or handball or "horse* riding" or hockey or lacrosse or mountaineering or netball or "net ball" or "racquet sport*" or racquetball or ringette or rodeo* or "roller derb*" or rollerskat* rugby or skateboard* or skating or skiing or snowboard* or "snow sport*" or soccer or softball or squash or swimming or tennis or "track and field" or wrestling or volleyball) ) OR AB ( (baseball or basketball or biking or bicycling* or bmx or boxing or "bull rid*" or bullrid* or cheerleading or "cheer leading" or climbing or cricket or diving or equestrian or football or golf or gymnastics or handball or "horse* riding" or hockey or lacrosse or mountaineering or netball or "net ball" or "racquet sport*" or racquetball or ringette or rodeo* or "roller derb*" or rollerskat* rugby or skateboard* or skating or skiing or snowboard* or "snow sport*" or soccer or softball or squash or swimming or tennis or "track and field" or wrestling or volleyball) ) OR KW ( (baseball or basketball or biking or bicycling* or bmx or boxing or "bull rid*" or bullrid* or cheerleading or "cheer leading" or climbing or cricket or diving or equestrian or football or golf or gymnastics or handball or "horse* riding" or hockey or lacrosse or mountaineering or netball or "net ball" or "racquet sport*" or racquetball or ringette or rodeo* or "roller derb*" or rollerskat* rugby or skateboard* or skating or skiing or snowboard* or "snow sport*" or soccer or softball or squash or swimming or tennis or "track and field" or wrestling or volleyball) ) | 558,146 |

|     |                                                                                                                                                                                                                                                                                                                                                                                                                                                                                                                                                                                                                                                                                                                                                                                                                                                                                                                                                                                                                                                                                                                                                             |           |
|-----|-------------------------------------------------------------------------------------------------------------------------------------------------------------------------------------------------------------------------------------------------------------------------------------------------------------------------------------------------------------------------------------------------------------------------------------------------------------------------------------------------------------------------------------------------------------------------------------------------------------------------------------------------------------------------------------------------------------------------------------------------------------------------------------------------------------------------------------------------------------------------------------------------------------------------------------------------------------------------------------------------------------------------------------------------------------------------------------------------------------------------------------------------------------|-----------|
| S22 | TI ( ( archery or badminton or bobsled* or bobsleigh* or canoe* or "cross country" or fencing or kayak* or luge or rifle or rowing or sailing or skeleton or "ski jump*" or sledding or surfing or trampoline* or "water polo" or "weight lifting" or windsurfing or yachting) ) OR AB ( ( archery or badminton or bobsled* or bobsleigh* or canoe* or "cross country" or fencing or kayak* or luge or rifle or rowing or sailing or skeleton or "ski jump*" or sledding or surfing or trampoline* or "water polo" or "weight lifting" or windsurfing or yachting) ) OR KW ( ( archery or badminton or bobsled* or bobsleigh* or canoe* or "cross country" or fencing or kayak* or luge or rifle or rowing or sailing or skeleton or "ski jump*" or sledding or surfing or trampoline* or "water polo" or "weight lifting" or windsurfing or yachting) )                                                                                                                                                                                                                                                                                                    | 52,364    |
| S23 | TI ( (aikido or judo or jiu-jitsu or "jiu-jitsu" or jujitsu or "ju jitsu" or karate or kickbox* or "Martial art*" or taekwondo or "tae kwon do" or "tai ji") ) OR AB ( (aikido or judo or jiu-jitsu or "jiu-jitsu" or jujitsu or "ju jitsu" or karate or kickbox* or "Martial art*" or taekwondo or "tae kwon do" or "tai ji") ) OR KW ( (aikido or judo or jiu-jitsu or "jiu-jitsu" or jujitsu or "ju jitsu" or karate or kickbox* or "Martial art*" or taekwondo or "tae kwon do" or "tai ji") )                                                                                                                                                                                                                                                                                                                                                                                                                                                                                                                                                                                                                                                          | 13,959    |
| S24 | TI ( (capoeira or "Dim mak" or kenpo or "kung fu" or "pencak silat" or pitfight* or savate or "submission fight*" or UFC or "ultimate fighting champion*") ) OR AB ( (capoeira or "Dim mak" or kenpo or "kung fu" or "pencak silat" or pitfight* or savate or "submission fight*" or UFC or "ultimate fighting champion*") ) OR KW ( (capoeira or "Dim mak" or kenpo or "kung fu" or "pencak silat" or pitfight* or savate or "submission fight*" or UFC or "ultimate fighting champion*") )                                                                                                                                                                                                                                                                                                                                                                                                                                                                                                                                                                                                                                                                | 1,644     |
| S25 | TI ( (biker* or boxer* or "cheer leader*" or cheerleader* or climber* or cyclist* or diver or divers or fencer* or fighter* or footballer* or goalie* or golfer* or gymnast or gymnasts or "horse* rider*" or jockey* or judoka* or mountaineer* or rower* or sailor* or skater* or skier* or sledder* or snowboarder* or surfer* or swimmer* or "weight lifter*" or wrestler*) ) OR AB ( (biker* or boxer* or "cheer leader*" or cheerleader* or climber* or cyclist* or diver or divers or fencer* or fighter* or footballer* or goalie* or golfer* or gymnast or gymnasts or "horse* rider*" or jockey* or judoka* or mountaineer* or rower* or sailor* or skater* or skier* or sledder* or snowboarder* or surfer* or swimmer* or "weight lifter*" or wrestler*) ) OR KW ( (biker* or boxer* or "cheer leader*" or cheerleader* or climber* or cyclist* or diver or divers or fencer* or fighter* or footballer* or goalie* or golfer* or gymnast or gymnasts or "horse* rider*" or jockey* or judoka* or mountaineer* or rower* or sailor* or skater* or skier* or sledder* or snowboarder* or surfer* or swimmer* or "weight lifter*" or wrestler*) ) | 145,733   |
| S26 | S14 OR S15 OR S16 OR S17 OR S18 OR S19 OR S20 OR S21 OR S22 OR S23 OR S24 OR S25                                                                                                                                                                                                                                                                                                                                                                                                                                                                                                                                                                                                                                                                                                                                                                                                                                                                                                                                                                                                                                                                            | 1,191,404 |
| S27 | S13 AND S26                                                                                                                                                                                                                                                                                                                                                                                                                                                                                                                                                                                                                                                                                                                                                                                                                                                                                                                                                                                                                                                                                                                                                 | 2,891     |
| S28 | TI ( ( (stroke* N2 (volume or heat or length or repetition* or quality or cycle* or asymmetrical or symmetrical or power or distance or index or gearing or kinematic* or velocity or biomechanics or mechanics or technique* or amplitude*)) ) ) OR AB ( ( (stroke* N2 (volume or heat or length or repetition* or quality or cycle* or asymmetrical or symmetrical or power or distance or index or gearing or kinematic*                                                                                                                                                                                                                                                                                                                                                                                                                                                                                                                                                                                                                                                                                                                                 | 3,612     |

|     |                                                                                                                                                                                                                                                                                                                                                                                                                                                                                                                                                                                          |        |
|-----|------------------------------------------------------------------------------------------------------------------------------------------------------------------------------------------------------------------------------------------------------------------------------------------------------------------------------------------------------------------------------------------------------------------------------------------------------------------------------------------------------------------------------------------------------------------------------------------|--------|
|     | or velocity or biomechanics or mechanics or technique* or amplitude*)) ) ) OR KW ( ( (stroke* N2 (volume or heat or length or repetition* or quality or cycle* or asymmetrical or symmetrical or power or distance or index or gearing or kinematic* or velocity or biomechanics or mechanics or technique* or amplitude*)) ) ) )                                                                                                                                                                                                                                                        |        |
| S29 | TI ( ( (Stroke* N3 (volley or overhand or underhand or overhead or crawl or rally or rallies or forehand or backhand or putting or smash* or backward or forward or special)) ) ) OR AB ( ( (Stroke* N3 (volley or overhand or underhand or overhead or crawl or rally or rallies or forehand or backhand or putting or smash* or backward or forward or special)) ) ) OR KW ( ( (Stroke* N3 (volley or overhand or underhand or overhead or crawl or rally or rallies or forehand or backhand or putting or smash* or backward or forward or special)) ) ) )                            | 960    |
| S30 | TI ( ( (Stroke* N1 (swimming or swim or kayak* or rowing or badminton or volleyball or tennis or golf* or paddl* or racket or racquet or practice or ball or balls or oar* or canoe*)) ) ) OR AB ( ( (Stroke* N1 (swimming or swim or kayak* or rowing or badminton or volleyball or tennis or golf* or paddl* or racket or racquet or practice or ball or balls or oar* or canoe*)) ) ) OR KW ( ( (Stroke* N1 (swimming or swim or kayak* or rowing or badminton or volleyball or tennis or golf* or paddl* or racket or racquet or practice or ball or balls or oar* or canoe*)) ) ) ) | 1,234  |
| S31 | DE "CRAWL stroke (Swimming)" OR DE "BUTTERFLY stroke (Swimming)" OR DE "STROKE volume (Cardiac output)" OR DE "HEAT stroke" OR DE "BACKSTROKE (Swimming)" OR DE "SIDE STROKE (Swimming)" OR DE "ROWING techniques" OR DE "RELEASE (Rowing)" OR DE "BREASTSTROKE (Swimming)"                                                                                                                                                                                                                                                                                                              | 1,959  |
| S32 | S28 OR S29 OR S30 OR S31                                                                                                                                                                                                                                                                                                                                                                                                                                                                                                                                                                 | 6,689  |
| S33 | S27 NOT S32                                                                                                                                                                                                                                                                                                                                                                                                                                                                                                                                                                              | 1,772  |
| S34 | TI Rat or rats or fish* or duck* or worm* or zebrafish* or mice or mouse or fin or fins or rabbit* or dog or dogs or animal-model* or bovine or rodent* or whale* or lion*                                                                                                                                                                                                                                                                                                                                                                                                               | 29,683 |
| S35 | S33 NOT S34                                                                                                                                                                                                                                                                                                                                                                                                                                                                                                                                                                              | 1,766  |
| S36 | S33 NOT S34<br>Narrow by Language: - english<br><br>Excluded books, web-based, dissertations                                                                                                                                                                                                                                                                                                                                                                                                                                                                                             | 1,441  |

## Scopus

```
(( ( ( TITLE ( ( stroke OR strokes ) ) OR TITLE-ABS-
KEY ( ( ( ischemic OR ischaemic OR lacunar OR acute ) W/2 stroke* ) ) ) ) OR ( TITLE-ABS-
KEY ( ( ( cerebrovasc* OR "cerebral
vasc*" ) W/2 ( injur* OR disease* OR incident* OR accident* ) ) ) ) OR ( TITLE-ABS-
KEY ( ( ( brain* OR cerebr* OR cerebell* OR intracerebral OR intracranial OR subarachnoid ) W/2 (
haemorrhage* OR hemorrhage* OR haematoma* OR hematoma* OR bleed* ) ) ) ) OR ( ( TITLE-
ABS-KEY ( ( ( artery OR arterial ) W/2 dissection ) ) OR TITLE-ABS-
KEY ( ( transient W/2 attack* ) ) OR TITLE-ABS-
KEY ( ( hemipleg* OR hemipar* OR paresis OR paretic OR hemineglect OR hemi-
neglect OR ( ( unilateral OR spatial OR hemi?spatial OR visual ) W/2 neglect ) ) ) ) ) ) AND ( TITLE-
ABS-KEY ( athlete* OR athletic* OR para-athlete* OR parathlet* OR paralympic* OR para-
olympic* OR AND olympic* ) OR ( ( TITLE-ABS-
KEY ( baseball OR basketball OR biking OR bicycling* OR bmx OR boxing OR "bull
rid*" OR bullrid* OR cheerleading OR "cheer
leading" OR climbing OR cricket OR diving OR equestrian OR football OR golf OR gymnastics OR
handball OR "horse* riding" OR hockey OR lacro ) OR TITLE-ABS-KEY ( "horse*
riding" OR hockey OR lacrosse OR mountaineering OR netball OR "net ball" OR "racquet
sport*" OR racquetball OR ringette OR "roller derb*" OR rollerskat* OR rodeo* ) OR TITLE-ABS-
KEY ( rugby OR skateboard* OR skating OR skiing OR snowboard* OR "snow
sport*" OR soccer OR softball OR squash OR swimming OR tennis OR "track and
field" OR wrestling OR volleyball ) OR TITLE-ABS-
KEY ( archery OR badminton OR bobsled* OR bobsleigh* OR canoe* OR "cross
country" OR fencing OR kayak* OR luge OR rifle ) OR TITLE-ABS-
KEY ( rowing OR sailing OR skeleton OR "ski
jump*" OR sledding OR surfing OR trampolin* OR "water polo" OR "weight
lifting" OR windsurfing OR yachting ) ) ) OR ( ( TITLE-ABS-KEY ( aikido OR judo OR jiu-jitsu OR "jiu-
jitsu" OR ju-jitsu OR "ju jitsu" OR karate OR kickbox* OR "Martial art*" OR taekwondo OR "tae
kwon do" OR "tai ji" ) OR TITLE-ABS-KEY ( capoeira OR "Dim mak" OR kenpo OR "kung
fu" OR "pencak silat" OR pitfight* OR savate OR "submission fight*" OR ufc OR "ultimate fighting
champion*" ) OR TITLE-ABS-KEY ( biker* OR boxer* OR "cheer
leader*" OR cheerleader* OR climber* OR cyclist* OR diver OR divers OR fencer* OR fighter* O
R footballer* OR goalie* ) OR TITLE-ABS-KEY ( golfer* OR gymnast OR gymnasts OR "horse*
rider*" OR jockey* OR judoka* OR mountaineer* OR rower* OR sailor* OR skater* OR skier* OR
sledder* OR snowboarder* OR surfer* OR swimmer* OR "weight
lifter*" OR wrestler* ) ) ) ) ) AND NOT ( ( TITLE-ABS-
KEY ( ( ( ( stroke* W/2 ( volume OR heat OR length OR repetition* OR quality OR cycle* OR asym
metrical OR symmetrical OR power OR distance OR index OR gearing OR kinematic* OR velocity
OR biomechanics OR mechanics OR technique* OR amplitude* ) ) ) ) ) OR TITLE-ABS-
KEY ( ( ( ( stroke* W/3 ( volley OR overhand OR underhand OR overhead OR crawl OR rally OR ral
lies OR forehand OR backhand OR putting OR smash* OR backward OR forward OR special ) ) ) ) )
OR TITLE-ABS-
KEY ( ( ( ( stroke* W/1 ( swimming OR swim OR kayak* OR rowing OR badminton OR volleyball O
R tennis OR golf* OR paddl* OR racket OR racquet OR practice OR ball OR balls OR oar* OR ca
noe* ) ) ) ) ) ) ) ) ) ) AND NOT INDEX ( medline ) AND ( LIMIT-TO ( LANGUAGE , "English" ) ) View less
```
